# Supplementary material for: High photoactive black phase stability of CsPbI3nanocrystals under damp-heat conditions of 85 °C and 85% relative humidity
Source: Royal Society of Chemistry journal article supplement (doi:10.1039/d2ta09738a), 2023-01-01
Supplement: d2ta09738a1.pdf [file d2ta09738a1.pdf]

## Supporting Information

### **High Photoactive Black Phase Stability of CsPbI<sub>3</sub> Nanocrystals under Damp-heat Conditions of 85°C and 85% Relative Humidity**

Shengwen Zou<sup>a</sup>, Jun Kang<sup>b</sup>, Yuzheng Zhang<sup>a</sup>, Mingjing Qi<sup>a</sup>, Xiaojun Yan<sup>a</sup>, Xiaoliang Zhang<sup>a</sup> and Jianmei Huang<sup>a,\*</sup>

<sup>a</sup> *School of Energy and Power Engineering, Beihang University, Beijing 100191, China*

<sup>b</sup> *Beijing Computational Science Research Center, Beijing 100193, China*

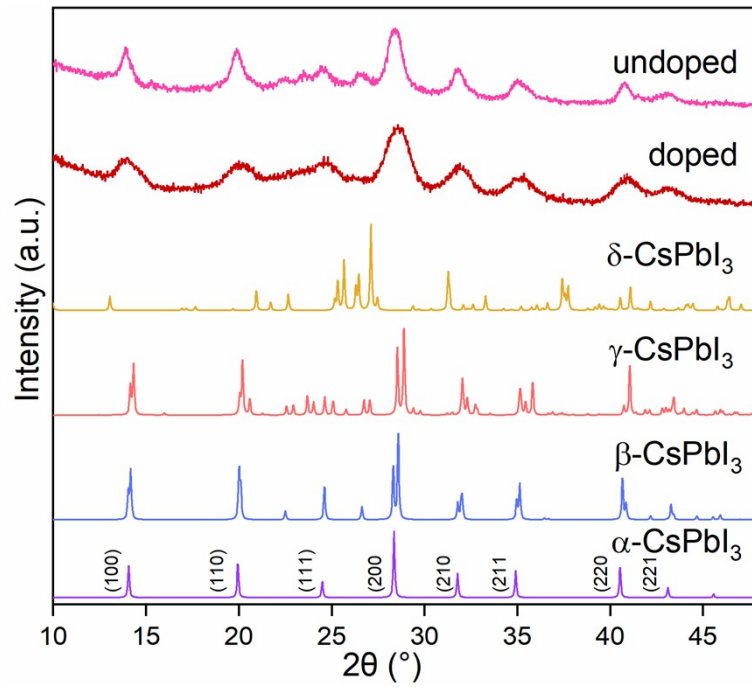

**Figure S1.** XRD pattern analysis of undoped and doped (Ni-3.65%) CsPbI<sub>3</sub> NCs.

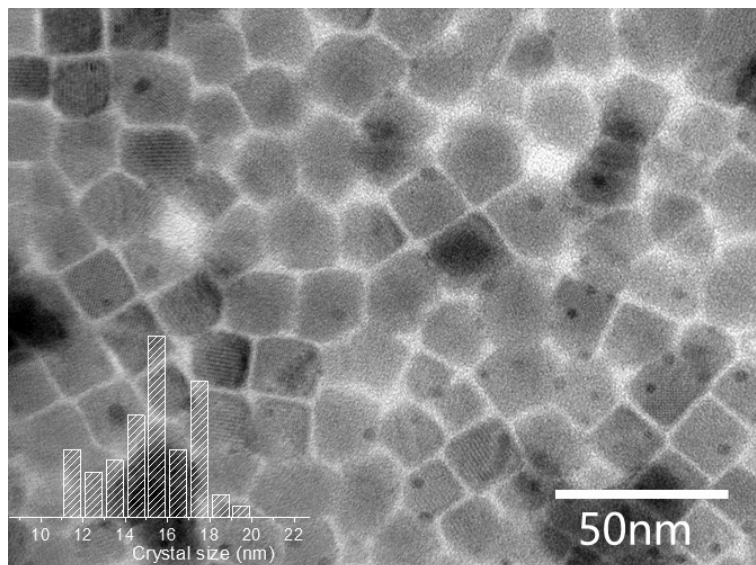

**Figure S2.** TEM image and size distribution statistics of undoped CsPbI<sub>3</sub> NCs.

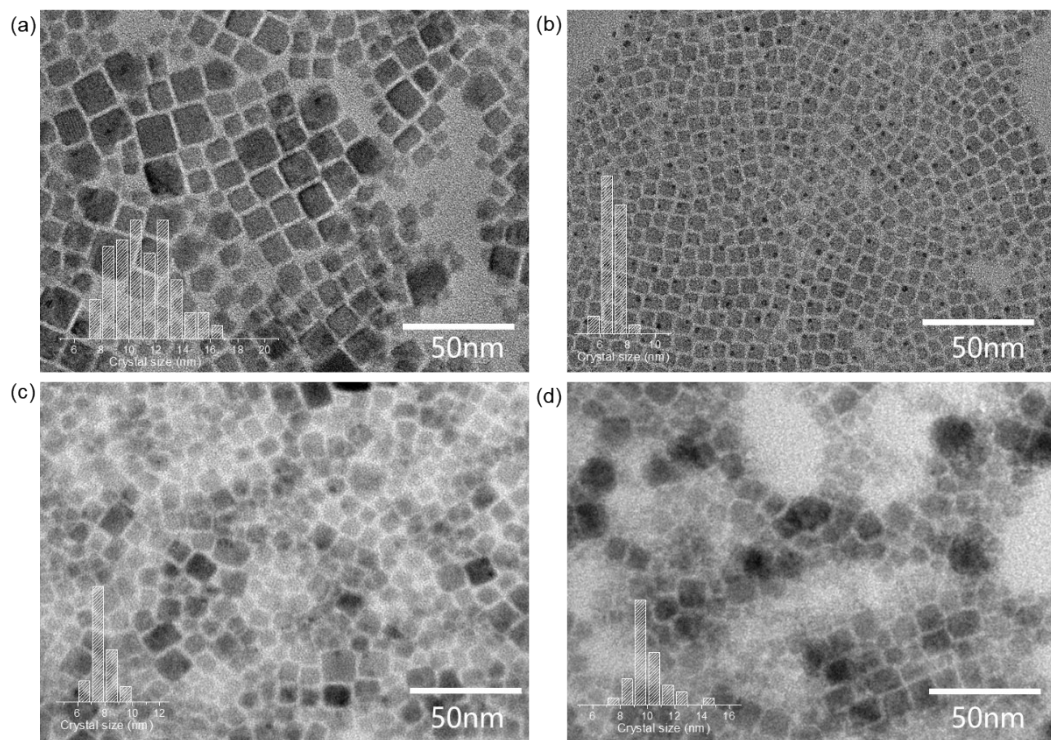

**Figure S3.** TEM images and size distribution statistics of (a) Ni-1.25%, (b) Ni-3.65%, (c) Ni-4.42%, (d) Ni-5.28% CsPbI<sub>3</sub> NCs.

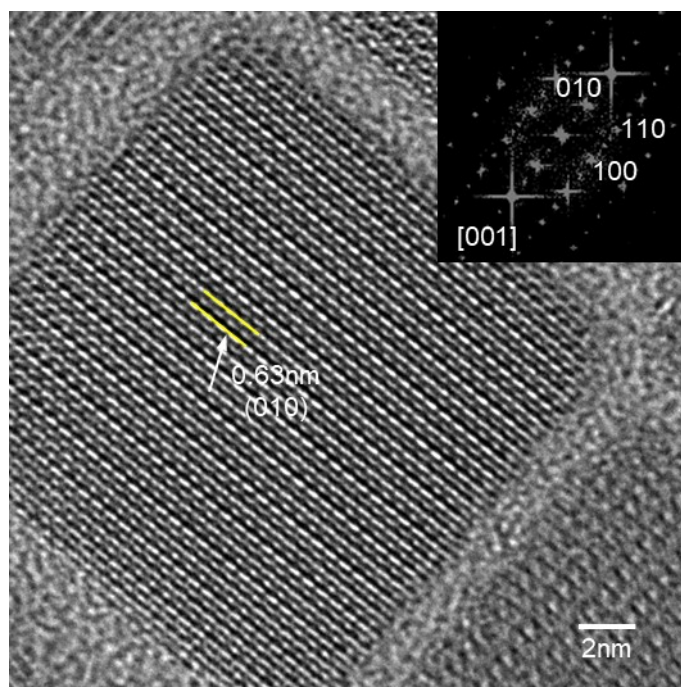

**Figure S4.** HRTEM image and corresponding FFT of Ni-1.25% CsPbI<sub>3</sub> NCs.

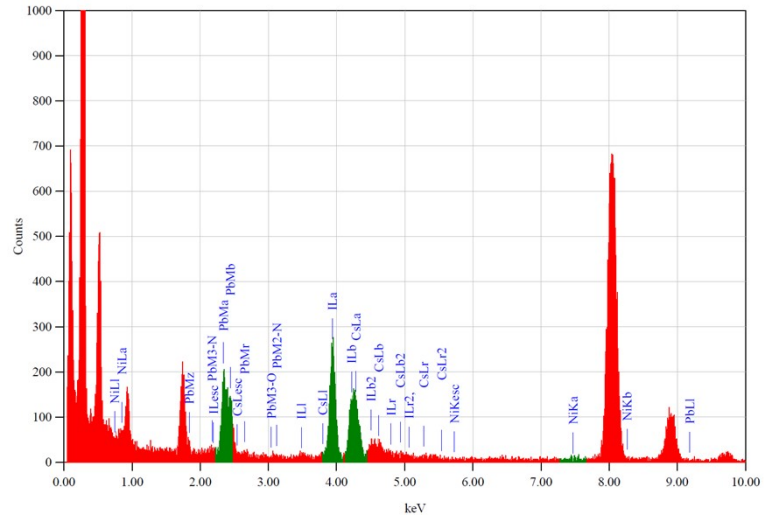

**Figure S5.** EDS spectrum of Ni-3.65% CsPbI<sub>3</sub> NCs.

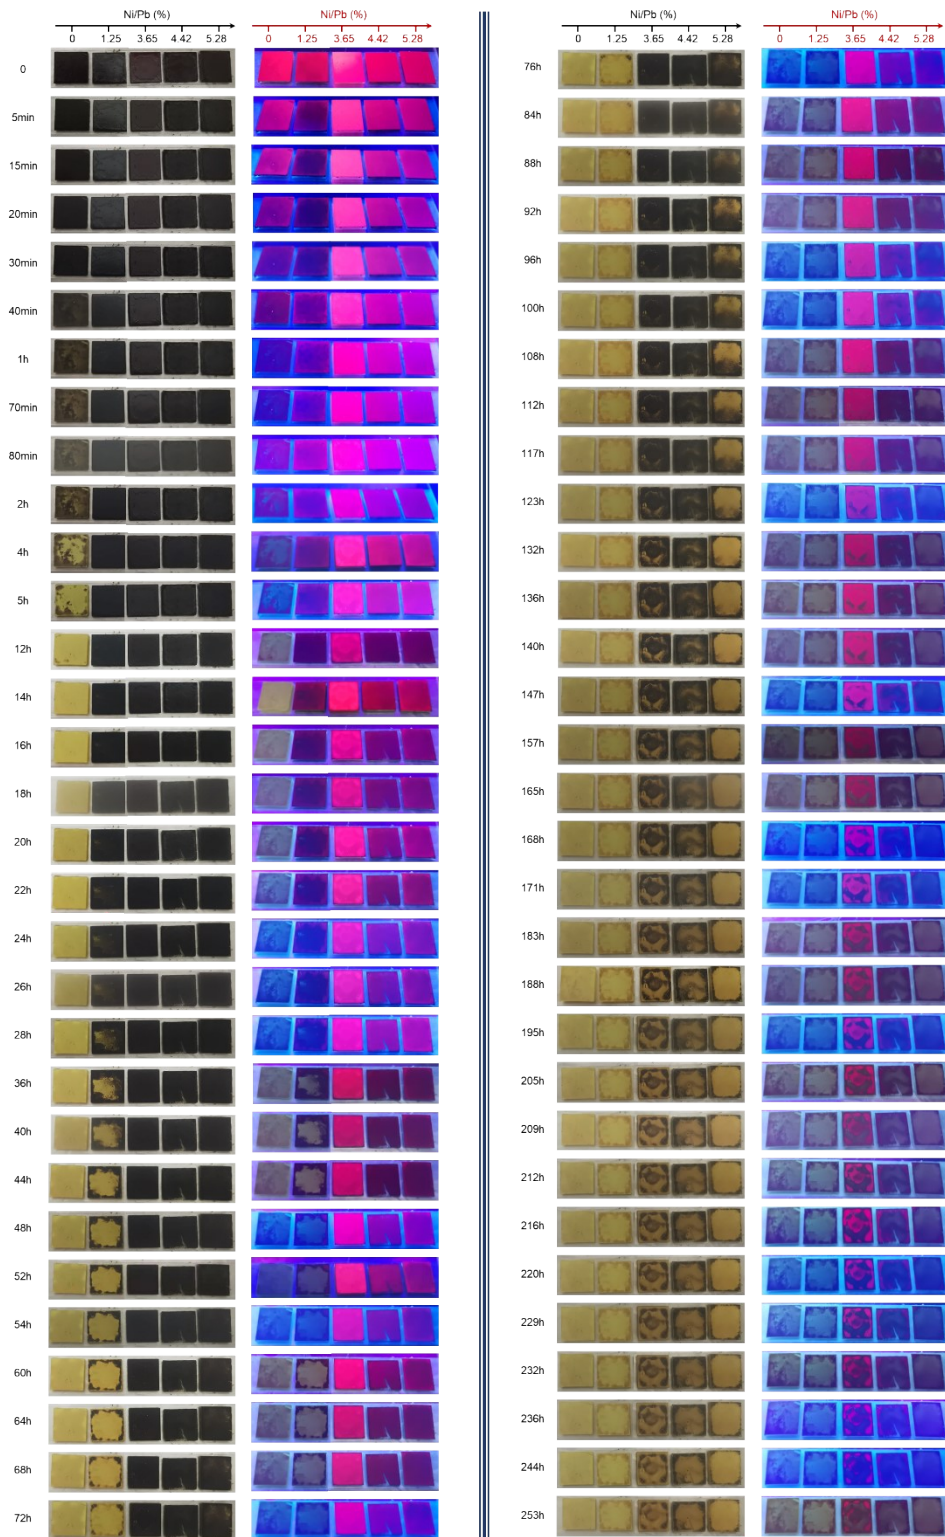

**Figure S6.** Full spectrum of the 85°C/85% RH damp-heat stability test of undoped and doped CsPbI<sub>3</sub> NCs films.

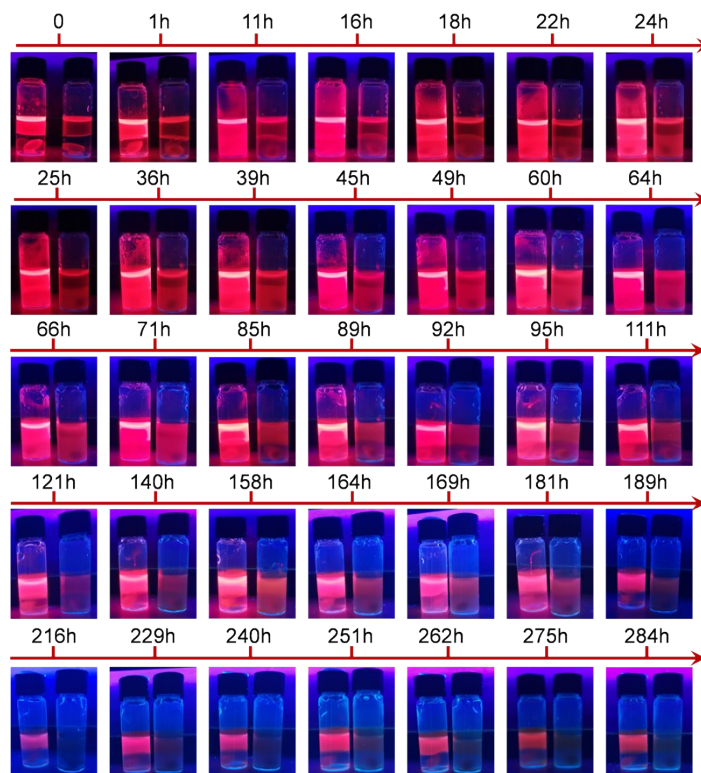

**Figure S7.** The stability of doped (Ni-3.65% CsPbI<sub>3</sub> NCs, left) and undoped (right) CsPbI<sub>3</sub> NCs solutions mixed with equal volume of water, the solutions were intensely sloshed by stirrers in the whole test process.

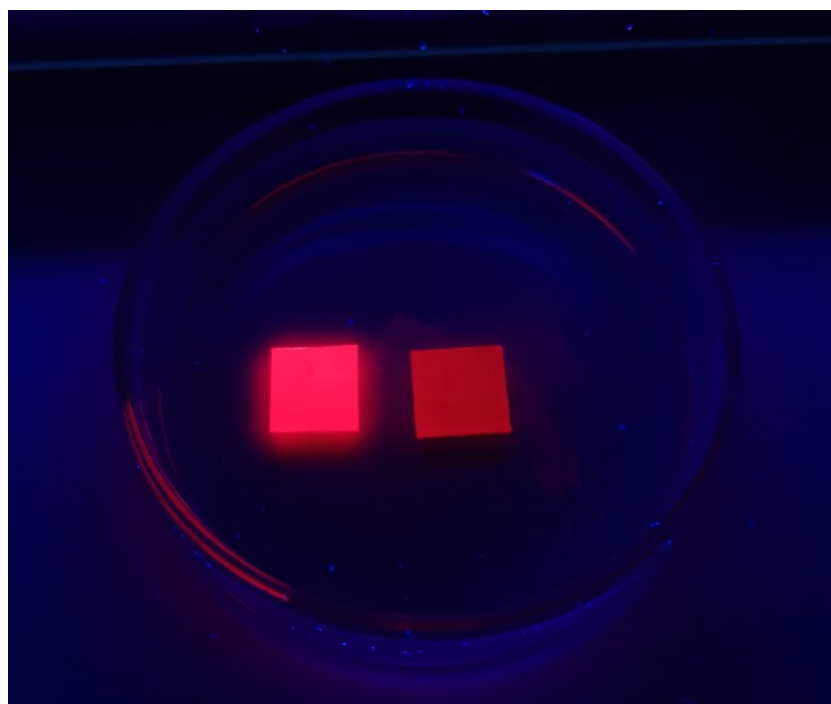

**Figure S8.** Doped (Ni-3.65% CsPbI<sub>3</sub> NCs, left) and undoped (right) CsPbI<sub>3</sub> NCs films soaking in the water.

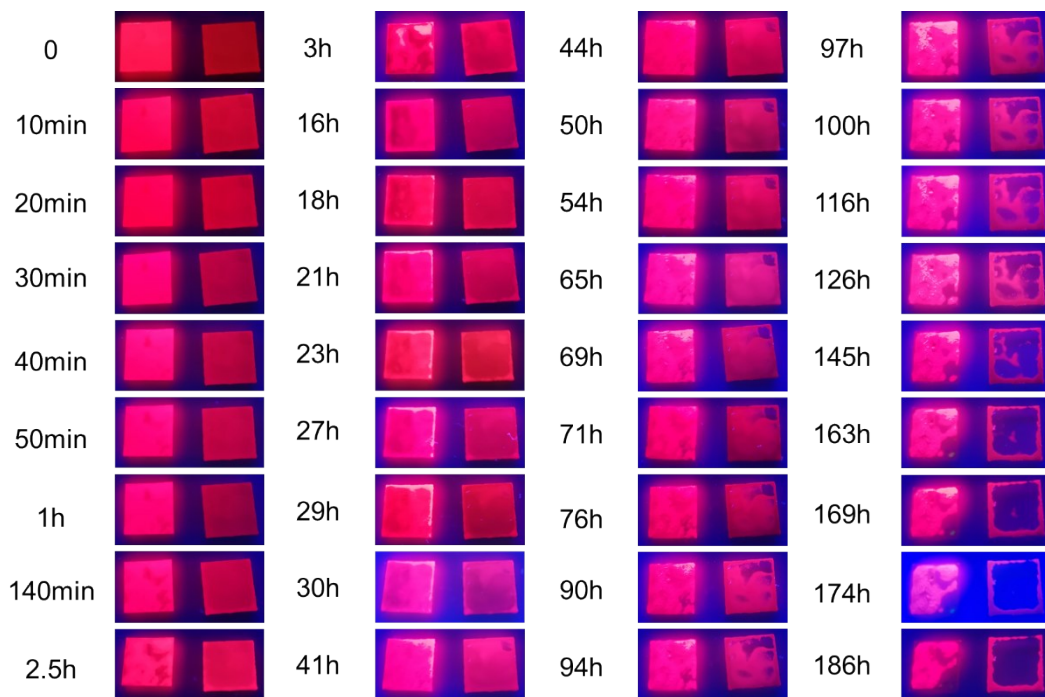

**Figure S9.** The stability of doped (Ni-3.65% CsPbI<sub>3</sub> NCs, left) and undoped (right) CsPbI<sub>3</sub> NCs films soaking in water.

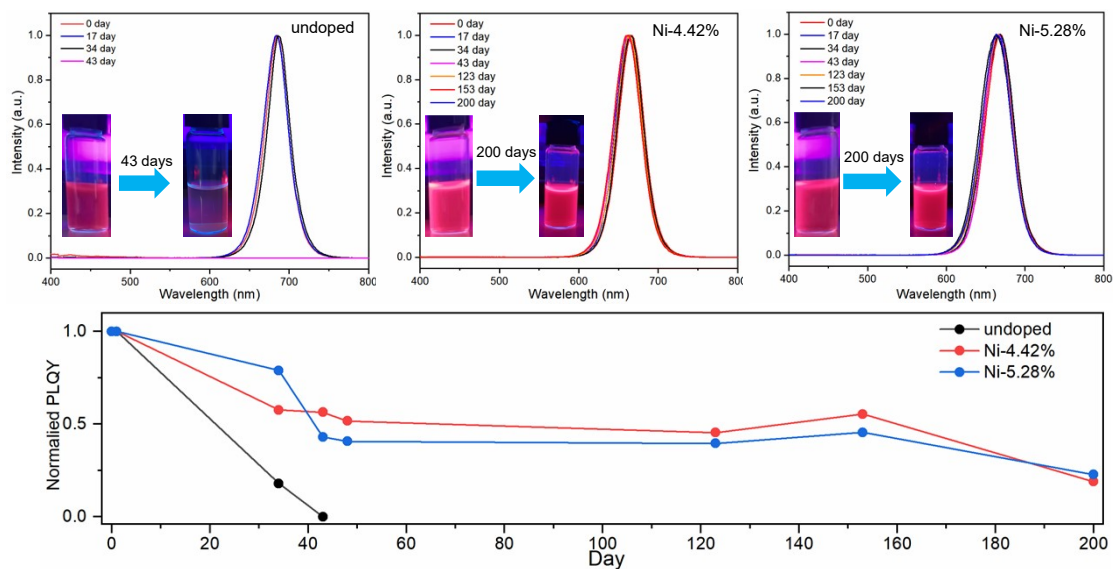

**Figure S10.** The stability of doped and undoped CsPbI<sub>3</sub> NCs solutions under ambient condition.

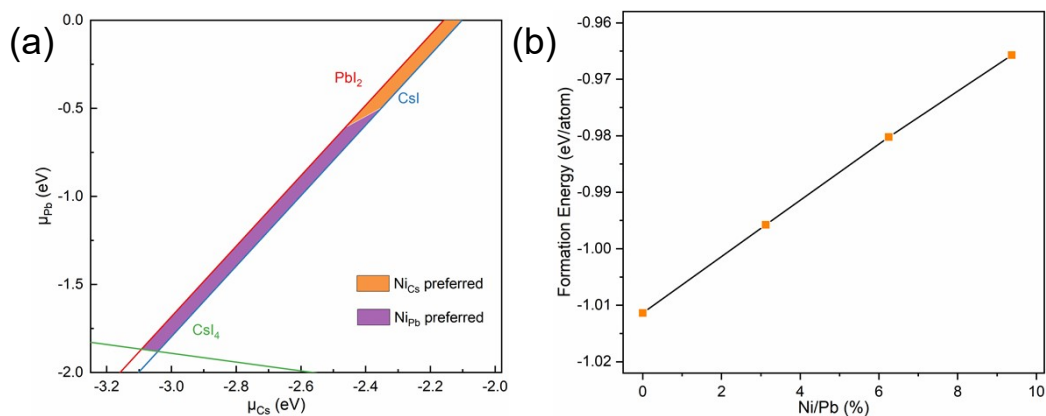

**Figure S11.** DFT calculation results. (a) Stability regions of Cs, Pb, and I compounds against Cs and Pb chemical potentials. The shaded region is the stability region for the synthesis of  $\text{CsPbI}_3$ , and the different patterns indicate whether the formation of  $\text{Ni}_{\text{Cs}}$  or  $\text{Ni}_{\text{Pb}}$  is preferred. The formation of  $\text{Ni}_i$  is not favored over the whole region. (b) Crystal formation energies of  $\text{CsPbI}_3$  with different Ni/Pb doping concentrations.

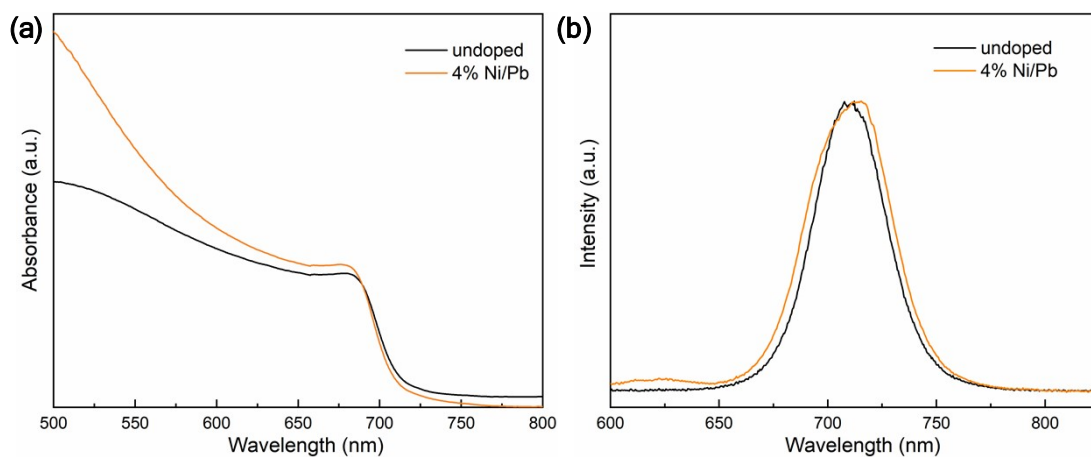

**Figure S12.** Absorption spectrum (a) and photoluminescence (PL) spectrum (b) of the undoped  $\text{CsPbI}_3$  and  $\text{Ni}^{2+}$  doped  $\text{CsPbI}_3$  (4% Ni/Pb) bulk films.



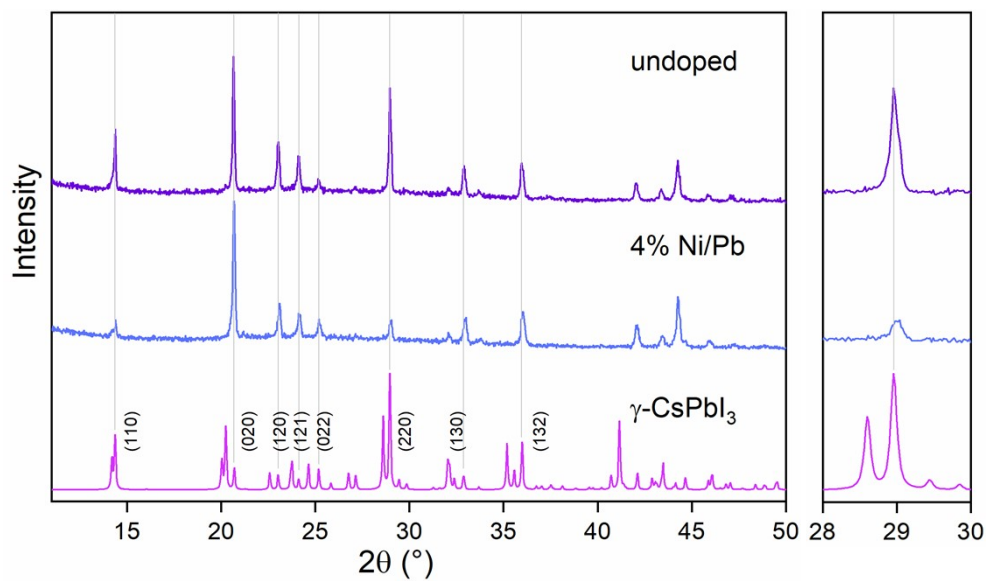

**Figure S13.** XRD pattern of the undoped CsPbI<sub>3</sub> and Ni<sup>2+</sup> doped CsPbI<sub>3</sub> (4% Ni/Pb) bulk films.

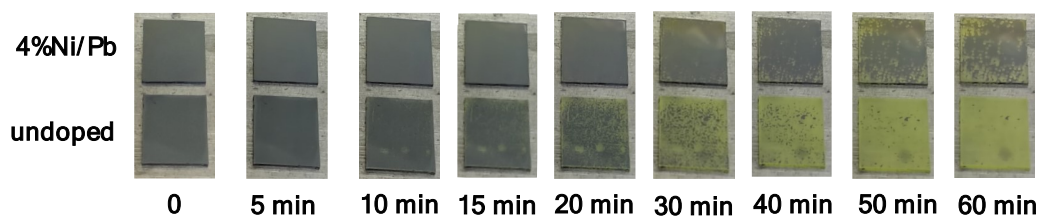

**Figure S14.** Stabilities of the Ni<sup>2+</sup> doped CsPbI<sub>3</sub> (4% Ni/Pb) and undoped CsPbI<sub>3</sub> bulk films at 150 °C under the N<sub>2</sub> atmosphere.

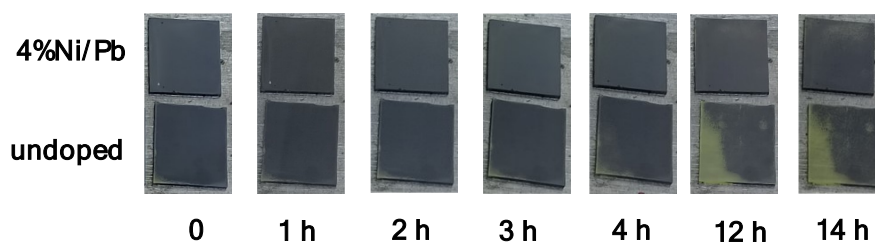

**Figure S15.** Stabilities of the Ni<sup>2+</sup> doped CsPbI<sub>3</sub> (4% Ni/Pb) and undoped CsPbI<sub>3</sub> bulk film at 85 °C under the N<sub>2</sub> atmosphere.

**Table S1.** ICP-MS results of Ni doped CsPbI<sub>3</sub> NCs with different reaction temperature and NiI<sub>2</sub>/PbI<sub>2</sub> loading ratio.

| Samples  | NiI <sub>2</sub> /PbI <sub>2</sub> | Reaction Temperatures (°C) | ICP-MS results (Ni/Pb) | Sizes (nm) |
|----------|------------------------------------|----------------------------|------------------------|------------|
| undoped  | 0:1                                | 170                        | -                      | 15.23      |
| Ni-1.25% | 1:1                                | 170                        | 0.0125:1               | 11.08      |
| Ni-3.65% | 3:1                                | 170                        | 0.0365:1               | 6.95       |
| Ni-4.42% | 3:1                                | 185                        | 0.0442:1               | 7.76       |
| Ni-5.28% | 3:1                                | 200                        | 0.0528:1               | 10.03      |

**Table S2.** Fitted TRPL decay results, average lifetimes ( $\tau_{ave}$ ), PLQYs, radiative ( $\Gamma_{rad}$ ) and nonradiative ( $\Gamma_{non-rad}$ ) decay rates of undoped and doped NCs. Crystal sizes were also given. The methods of calculation referenced previous study<sup>1</sup>. The bi-exponential function was used to fit the decay curves except Ni-3.65% CsPbI<sub>3</sub> NCs, because it sufficient to be fitted with a single-exponential function for Ni-3.65% CsPbI<sub>3</sub> NCs.

| Samples  | A1   | $\tau_1$ (ns) | A2   | $\tau_2$ (ns) | $\tau_{ave}$ (ns) | PLQY (%) | $\Gamma_{rad}$ ( $\mu s^{-1}$ ) | $\Gamma_{non-rad}$ ( $\mu s^{-1}$ ) | Sizes (nm) |
|----------|------|---------------|------|---------------|-------------------|----------|---------------------------------|-------------------------------------|------------|
| undoped  | 0.66 | 22.97         | 0.33 | 106.34        | 81.08             | 0.31     | 3.88                            | 8.45                                | 15.23      |
| Ni-1.25% | 0.82 | 26.97         | 0.21 | 95.54         | 59.27             | 0.57     | 9.56                            | 7.31                                | 11.08      |
| Ni-3.65% | 1.03 | 18.94         | 0.00 | 0.00          | 18.94             | 0.88     | 46.31                           | 6.50                                | 6.95       |
| Ni-4.42% | 0.89 | 26.59         | 0.15 | 84.21         | 46.93             | 0.64     | 13.66                           | 7.65                                | 7.76       |
| Ni-5.28% | 0.84 | 28.62         | 0.19 | 94.78         | 57.34             | 0.59     | 10.24                           | 7.20                                | 10.03      |

1. Z.-J. Yong, S.-Q. Guo, J.-P. Ma, J.-Y. Zhang, Z.-Y. Li, Y.-M. Chen, B.-B. Zhang, Y. Zhou, J. Shu, J.-L. Gu, L.-R. Zheng, O. M. Bakr and H.-T. Sun, *J. Am. Chem. Soc.*, 2018, **140**, 9942-9951.
